# Supplementary material for: Menopausal hormone therapy increases the risk of gallstones: Health Insurance Database in South Korea (HISK)-based cohort study
Source: PubMed Central journal article supplement (PMC10695378; doi:10.1371/journal.pone.0294356), 2023-12-04
Supplement: pone.0294356.s001.pdf [file pone.0294356.s001.pdf]

Supplementary table 1. Menopausal hormones are organized into groups.

| MHT (generic name)                                             | Brand name             |
|----------------------------------------------------------------|------------------------|
| Combined Estrogen plus progestin by the manufacturer           |                        |
| Estradiol Hemihydrate 1.03mg, Drospirenone 2mg                 | Angelic                |
| Estradiol Valerate 2mg, Medroxyprogesterone Acetate 10mg       | Divina                 |
| Estradiol Valerate 1mg, Medroxyprogesterone Acetate 2.5mg      | Indivina Tab 1mg/2.5mg |
| Estradiol Valerate 1mg, Medroxyprogesterone Acetate 5mg        | Indivina Tab 1mg/5mg   |
| Estradiol Valerate 2mg, Medroxyprogesterone Acetate 2.5mg      | Indivina Tab 2mg/2.5mg |
| Estradiol Hemihydrate 2mg, Norethisterone Acetate 1mg          | Cliane                 |
| Estradiol Hemihydrate 2.06mg, Dydrogesterone 10mg              | Femoston 2/10          |
| Estradiol Hemihydrate 1.03mg, Dydrogesterone 10mg              | Femoston 1/10          |
| Estradiol Hemihydrate 1.03mg, Dydrogesterone 5mg               | Femoston Coti          |
| Cyproterone Acetate 1mg, Estradiol Valerate 2mg                | Climen                 |
| Estradiol Hemihydrate 1.03mg, Norethisterone Acetate 0.5mg     | Esdiol-half            |
| Estradiol Valerate 1.31mg, Norethisterone Acetate 0.5mg        | Cliovelle              |
| Combined Estrogen plus progestin by the physician <sup>a</sup> |                        |
| Progesterone Micronized 100mg                                  | Utrogestan 100mg       |
| Medroxyprogesterone Acetate 5mg                                | Provera 5mg            |
| Medroxyprogesterone Acetate 10mg                               | Provera 10mg           |
| Dydrogesterone 10mg                                            | Duphaston              |
| Estrogen                                                       |                        |
| Conjugated Estrogens 0.3mg                                     | Premina 0.3mg          |
| Conjugated Estrogens 0.625mg                                   | Premina 0.625mg        |
| Estradiol Valerate 1mg                                         | Progynova 1mg          |
| Estradiol Valerate 2mg                                         | Progynova 2mg          |
| Estradiol Hemihydrate 1mg                                      | Preda 1mg              |

Tibolone

Tibolone 2.5mg

Livial, Rabilone, Libolone, Libron, Live  
on, Liviem, Tiborisi, Tibolan, Tibiol,  
Pharmbio Korea Tibolone, Hyundai  
Tibolone

Topical estrogen

Estradiol Hemihydrate

Estreva Gel, Climara patch, Divigel Gel

---

MHT, menopausal hormone therapy

<sup>a</sup> This group used the progestin below and the estrogen group above simultaneously.
