# Supplementary material for: Menopausal hormone therapy increases the risk of gallstones: Health Insurance Database in South Korea (HISK)-based cohort study
Source: PubMed Central journal article supplement (PMC10695378; doi:10.1371/journal.pone.0294356), 2023-12-04
Supplement: pone.0294356.s002.pdf [file pone.0294356.s002.pdf]

Supplementary table 2. Hazard ratios for determining the likelihood of developing gallbladder disease based on the major variables.

| Variables                                            | Gallbladder stone <sup>a</sup> |         | Cholecystitis <sup>a</sup> |         | Gallbladder cancer <sup>a</sup> |         |
|------------------------------------------------------|--------------------------------|---------|----------------------------|---------|---------------------------------|---------|
|                                                      | HR (95% CI) <sup>a</sup>       | P-value | HR (95% CI) <sup>a</sup>   | P-value | HR (95% CI) <sup>a</sup>        | P-value |
| <b>MHT</b>                                           |                                |         |                            |         |                                 |         |
| Tibolone                                             | 1.347 (1.309-1.387)            | <0.001  | 1.232 (1.155-1.315)        | <0.001  | 0.914 (0.79-1.058)              | 0.23    |
| Combined estrogen plus progestin by the manufacturer | 1.146 (1.103-1.19)             | <0.001  | 1.15 (1.058-1.251)         | 0.001   | 0.856 (0.705-1.041)             | 0.119   |
| Oral Estrogen                                        | 1.241 (1.18-1.305)             | <0.001  | 0.981 (0.87-1.107)         | 0.756   | 0.991 (0.778-1.263)             | 0.941   |
| Combined Estrogen plus progestin by the physician    | 1.164 (1.01-1.341)             | 0.036   | 1.024 (0.74-1.415)         | 0.887   | 0.65 (0.291-1.45)               | 0.293   |
| Topical estrogen                                     | 1.602 (1.295-1.983)            | <0.001  | 0.962 (0.532-1.739)        | 0.898   | 2.15 (0.963-4.799)              | 0.062   |
| <b>Age at inclusion (years)</b>                      |                                |         |                            |         |                                 |         |
| 50~59                                                | 1.074 (1.031-1.119)            | <0.001  | 1.082 (0.988-1.186)        | 0.091   | 1.715 (1.357-2.166)             | <0.001  |
| 60~69                                                | 1.198 (1.127-1.272)            | <0.001  | 1.377 (1.207-1.572)        | <0.001  | 2.807 (2.089-3.774)             | <0.001  |
| 70~                                                  | 1.495 (1.394-1.603)            | <0.001  | 2.234 (1.926-2.59)         | <0.001  | 4.801 (3.482-6.621)             | <0.001  |
| <b>BMI (kg/m<sup>2</sup>)</b>                        |                                |         |                            |         |                                 |         |
| <18.5                                                | 0.906 (0.828-0.992)            | 0.033   | 0.954 (0.796-1.144)        | 0.613   | 0.756 (0.502-1.137)             | 0.179   |
| 23-24.9                                              | 1.187 (1.155-1.221)            | <0.001  | 1.06 (0.998-1.126)         | 0.057   | 1.072 (0.95-1.209)              | 0.26    |
| 25-29.9                                              | 1.393 (1.357-1.429)            | <0.001  | 1.242 (1.175-1.313)        | <0.001  | 1.268 (1.136-1.415)             | <0.001  |
| ≥30                                                  | 1.824 (1.739-1.913)            | <0.001  | 1.557 (1.404-1.727)        | <0.001  | 1.342 (1.081-1.666)             | 0.008   |
| <b>SES</b>                                           |                                |         |                            |         |                                 |         |
| Low SES                                              | 1.38 (1.304-1.46)              | <0.001  | 1.444 (1.285-1.624)        | <0.001  | 0.973 (0.734-1.292)             | 0.852   |
| <b>Region</b>                                        |                                |         |                            |         |                                 |         |
| Rural area                                           | 0.94 (0.919-0.962)             | <0.001  | 1.032 (0.982-1.085)        | 0.214   | 1.026 (0.929-1.134)             | 0.608   |
| <b>CCI</b>                                           |                                |         |                            |         |                                 |         |
| 1                                                    | 1.109 (1.08-1.139)             | <0.001  | 1.207 (1.142-1.276)        | <0.001  | 1.049 (0.938-1.173)             | 0.4     |

|                                            |                     |        |                     |        |                     |        |
|--------------------------------------------|---------------------|--------|---------------------|--------|---------------------|--------|
| ≥2                                         | 1.272 (1.236-1.309) | <0.001 | 1.328 (1.249-1.412) | <0.001 | 1.091 (0.961-1.237) | 0.178  |
| Parity (years)                             |                     |        |                     |        |                     |        |
| 0                                          | 0.975 (0.924-1.027) | 0.339  | 1.023 (0.908-1.153) | 0.712  | 1.083 (0.839-1.399) | 0.54   |
| 2                                          | 0.948 (0.907-0.991) | 0.018  | 1.07 (0.966-1.184)  | 0.195  | 1.127 (0.9-1.41)    | 0.297  |
| ≥3                                         | 1.019 (0.968-1.073) | 0.472  | 1.016 (0.904-1.142) | 0.79   | 1.095 (0.854-1.405) | 0.472  |
| Age at menarche (years)                    |                     |        |                     |        |                     |        |
| ≥13                                        | 1.025 (0.991-1.062) | 0.155  | 1.009 (0.935-1.088) | 0.823  | 1.067 (0.915-1.243) | 0.41   |
| Age at menopause (years)                   |                     |        |                     |        |                     |        |
| 45-49                                      | 0.985 (0.949-1.023) | 0.437  | 1.033 (0.954-1.119) | 0.426  | 1.177 (0.998-1.388) | 0.053  |
| 50-54                                      | 0.991 (0.951-1.032) | 0.656  | 1.035 (0.949-1.128) | 0.434  | 1.106 (0.93-1.315)  | 0.254  |
| 55-                                        | 1.065 (1.006-1.127) | 0.031  | 1.065 (0.944-1.202) | 0.307  | 1.299 (1.029-1.641) | 0.028  |
| Smoking                                    |                     |        |                     |        |                     |        |
| Past                                       | 1.145 (1.044-1.255) | 0.004  | 1.275 (1.054-1.544) | 0.013  | 1.082 (0.709-1.651) | 0.715  |
| Current                                    | 1.261 (1.192-1.334) | <0.001 | 1.442 (1.285-1.619) | <0.001 | 1.025 (0.775-1.356) | 0.862  |
| Alcohol (per week)                         |                     |        |                     |        |                     |        |
| ~2/week                                    | 0.927 (0.898-0.957) | <0.001 | 0.994 (0.928-1.064) | 0.862  | 1.023 (0.888-1.179) | 0.752  |
| 3~6/week                                   | 0.899 (0.825-0.979) | 0.014  | 1.019 (0.851-1.219) | 0.842  | 1.31 (0.92-1.865)   | 0.135  |
| Daily                                      | 1.007 (0.885-1.146) | 0.916  | 0.958 (0.718-1.277) | 0.769  | 1.366 (0.821-2.274) | 0.23   |
| Physical exercise (per week)               |                     |        |                     |        |                     |        |
| 1~2                                        | 0.993 (0.965-1.022) | 0.63   | 0.912 (0.856-0.973) | 0.005  | 1.05 (0.927-1.189)  | 0.444  |
| 3~4                                        | 0.972 (0.938-1.008) | 0.128  | 0.93 (0.858-1.007)  | 0.074  | 1.031 (0.88-1.207)  | 0.708  |
| 5~6                                        | 0.911 (0.856-0.969) | 0.003  | 0.931 (0.814-1.064) | 0.294  | 0.95 (0.723-1.248)  | 0.712  |
| Daily                                      | 0.97 (0.929-1.012)  | 0.159  | 1.015 (0.929-1.109) | 0.749  | 1.146 (0.97-1.353)  | 0.109  |
| Period from menopause to inclusion (years) |                     |        |                     |        |                     |        |
| 5~9                                        | 1.082 (1.049-1.117) | <0.001 | 1.042 (0.971-1.119) | 0.253  | 1.28 (1.104-1.484)  | 0.001  |
| 10~                                        | 1.166 (1.114-1.219) | <0.001 | 1.235 (1.12-1.362)  | <0.001 | 1.429 (1.176-1.737) | <0.001 |

BMI, Body mass index; CCI, Charlson comorbidity index; CI, confidence interval; HR, hazard ratio; MHT, menopausal hormone therapy; SES, socioeconomic status

<sup>a</sup> HRs were adjusted for age group, body mass index, socioeconomic status, region, Charlson comorbidity index, parity, age at menarche, age at menopause, smoking, alcohol, physical exercise, period from menopause to inclusion.
