# Supplementary material for: Menopausal hormone therapy increases the risk of gallstones: Health Insurance Database in South Korea (HISK)-based cohort study
Source: PubMed Central journal article supplement (PMC10695378; doi:10.1371/journal.pone.0294356), 2023-12-04
Supplement: pone.0294356.s003.pdf [file pone.0294356.s003.pdf]

Supplementary Table 3. The gallbladder disease cases per 100,000 person-years in this research

|                          | Non-MHT                 | Tibolone              | Combined Estrogen plus progestin by the manufacturer | Oral Estrogen       | Combined Estrogen plus progestin by the physician | Topical estrogen |
|--------------------------|-------------------------|-----------------------|------------------------------------------------------|---------------------|---------------------------------------------------|------------------|
| Total                    | 40,037/11,602,949 (345) | 9,572/2,423,410 (395) | 5,237/1,550,042 (338)                                | 2,619/696,521 (376) | 309/85,479 (361)                                  | 128/27,520 (465) |
| Age at inclusion (years) |                         |                       |                                                      |                     |                                                   |                  |
| 40~49                    | 3,029/1,097,318 (276)   | 1,507/434,404 (347)   | 1,124/359,727 (312)                                  | 622/187,708 (331)   | 50/15,298 (327)                                   | 30/5,966 (503)   |
| 50~59                    | 17,315/5,608,350 (309)  | 6,129/1,574,393 (389) | 3,458/1,019,662 (339)                                | 1,425/384,832 (370) | 184/50,420 (365)                                  | 79/16,798 (470)  |
| 60~69                    | 13,329/3,530,851 (378)  | 1,704/371,545 (459)   | 584/158,256 (369)                                    | 469/103,705 (452)   | 67/17,428 (384)                                   | 18/4,342 (415)   |
| 70~                      | 6,364/1,366,429 (466)   | 232/43,069 (539)      | 71/12,397 (573)                                      | 103/20,276 (508)    | 8/2,334 (343)                                     | 1/415 (241)      |
| BMI (kg/m <sup>2</sup> ) |                         |                       |                                                      |                     |                                                   |                  |
| <18.5                    | 604/207,319 (291)       | 152/40,377 (376)      | 84/29,984 (280)                                      | 37/9,906 (374)      | 8/1,731 (462)                                     | 2/569 (352)      |
| 18.5-22.9                | 11,484/3,895,178 (295)  | 3,468/959,904 (361)   | 2,085/688,496 (303)                                  | 816/253,646 (322)   | 131/35,061 (374)                                  | 39/10,259 (380)  |
| 23-24.9                  | 10,187/3,040,954 (335)  | 2,590/671,926 (385)   | 1,412/416,741 (339)                                  | 717/194,342 (369)   | 79/23,771 (332)                                   | 36/7,306 (493)   |
| 25-29.9                  | 14,356/3,783,310 (379)  | 2,935/669,267 (439)   | 1,441/374,226 (385)                                  | 900/210,027 (429)   | 78/22,436 (348)                                   | 49/8,428 (581)   |
| ≥30                      | 2,288/481,311 (475)     | 308/60,291 (511)      | 162/30,483 (531)                                     | 124/23,431 (529)    | 12/1,872 (641)                                    | 1/802 (125)      |
| SES                      |                         |                       |                                                      |                     |                                                   |                  |
| Mid-high SES             | 37,691/11,155,205 (338) | 9,107/2,343,413 (389) | 5,068/1,513,589 (335)                                | 2,537/678,998 (374) | 300/83,630 (359)                                  | 123/26,805 (459) |
| Low SES                  | 2,346/447,744 (524)     | 465/79,998 (581)      | 169/36,453 (464)                                     | 82/17,523 (468)     | 9/1,849 (487)                                     | 5/715 (699)      |
| Region                   |                         |                       |                                                      |                     |                                                   |                  |
| Urban area               | 12,008/3,408,252 (352)  | 3,194/759,708 (420)   | 1,822/529,470 (344)                                  | 860/220,908 (389)   | 170/43,432 (391)                                  | 57/12,462 (457)  |
| Rural area               | 28,029/8,194,696 (342)  | 6,378/1,663,703 (383) | 3,415/1,020,572 (335)                                | 1,759/475,613 (370) | 139/42,048 (331)                                  | 71/15,058 (471)  |
| CCI                      |                         |                       |                                                      |                     |                                                   |                  |
| 0                        | 24,272/7,665,639 (317)  | 6,131/1,652,855 (371) | 3,527/1,100,871 (320)                                | 1,713/487,827 (351) | 206/59,190 (348)                                  | 76/18,137 (419)  |
| 1                        | 8,458/2,262,737 (374)   | 2,001/471,667 (424)   | 1,001/280,325 (357)                                  | 521/125,841 (414)   | 55/16,134 (341)                                   | 34/5,036 (675)   |
| ≥2                       | 7,307/1,674,573 (436)   | 1,440/298,889 (482)   | 709/168,847 (420)                                    | 385/82,853 (465)    | 48/10,155 (473)                                   | 18/4,348 (414)   |
| Parity (years)           |                         |                       |                                                      |                     |                                                   |                  |
| 0 or not respond         | 8,064/2,340,501 (345)   | 1,715/426,228 (402)   | 772/227,738 (339)                                    | 605/157,417 (384)   | 57/18,601 (306)                                   | 26/6,363 (409)   |
| 1                        | 2,096/635,435 (330)     | 831/198,817 (418)     | 476/152,206 (313)                                    | 191/51,031 (374)    | 23/5,910 (389)                                    | 14/2,014 (695)   |
| 2                        | 24,010/6,996,270 (343)  | 6,106/1,561,400 (391) | 3,549/1,046,868 (339)                                | 1,530/415,365 (368) | 193/51,746 (373)                                  | 75/16,254 (461)  |
| ≥3                       | 5,867/1,630,743 (360)   | 920/236,965 (388)     | 440/123,230 (357)                                    | 293/72,709 (403)    | 36/9,223 (390)                                    | 13/2,889 (450)   |
| Age at menarche (years)  |                         |                       |                                                      |                     |                                                   |                  |
| <13                      | 7,002/2,136,579 (328)   | 1,475/369,362 (399)   | 822/231,533 (355)                                    | 528/131,709 (401)   | 52/16,503 (315)                                   | 26/5,156 (504)   |

|                                            | Non-MHT                 | Tibolone              | Combined Estrogen plus progestin by the manufacturer | Oral Estrogen       | Combined Estrogen plus progestin by the physician | Topical estrogen |
|--------------------------------------------|-------------------------|-----------------------|------------------------------------------------------|---------------------|---------------------------------------------------|------------------|
| ≥13                                        | 32,776/9,395,623 (349)  | 8,011/2,032,484 (394) | 4,384/1,308,097 (335)                                | 2,061/555,286 (371) | 256/68,161 (376)                                  | 99/22,011 (450)  |
| Age at menopause (years)                   |                         |                       |                                                      |                     |                                                   |                  |
| 40-44                                      | 5,377/1,594,163 (337)   | 1,303/308,749 (422)   | 648/187,274 (346)                                    | 569/154,039 (369)   | 38/11,517 (330)                                   | 23/5,570 (413)   |
| 45-49                                      | 11,623/3,389,186 (343)  | 3,046/800,465 (381)   | 1,742/523,883 (333)                                  | 941/248,141 (379)   | 94/27,810 (338)                                   | 51/10,010 (510)  |
| 50-54                                      | 19,417/5,651,904 (344)  | 4,445/1,132,382 (393) | 2,508/734,681 (341)                                  | 975/260,693 (374)   | 150/39,329 (381)                                  | 46/10,271 (448)  |
| 55-                                        | 3,620/967,696 (374)     | 778/181,815 (428)     | 339/104,203 (325)                                    | 134/33,648 (398)    | 27/6,825 (396)                                    | 8/1,670 (479)    |
| Smoking                                    |                         |                       |                                                      |                     |                                                   |                  |
| Never                                      | 35,875/10,621,090 (338) | 8,524/2,189,401 (389) | 4,702/1,402,794 (335)                                | 2,357/636,802 (370) | 283/78,952 (358)                                  | 121/25,293 (478) |
| Past                                       | 431/106,839 (403)       | 167/38,763 (431)      | 88/26,521 (332)                                      | 48/9,067 (529)      | 5/1,066 (469)                                     | 1/391 (256)      |
| Current                                    | 1,107/270,504 (409)     | 482/102,265 (471)     | 256/68,868 (372)                                     | 112/23,697 (473)    | 10/2,317 (432)                                    | 1/598 (167)      |
| Alcohol (g/week)                           |                         |                       |                                                      |                     |                                                   |                  |
| None                                       | 32,482/9,426,061 (345)  | 7,366/1,826,955 (403) | 3,946/1,148,572 (344)                                | 2,039/539,880 (378) | 246/68,861 (357)                                  | 101/21,945 (460) |
| ~2/week                                    | 4,338/1,400,517 (310)   | 1,577/445,268 (354)   | 964/309,080 (312)                                    | 434/118,207 (367)   | 46/12,516 (368)                                   | 21/4,223 (497)   |
| 3~6/week                                   | 500/158,817 (315)       | 217/57,282 (379)      | 128/40,053 (320)                                     | 50/12,222 (409)     | 4/1,129 (354)                                     | 1/399 (251)      |
| Daily                                      | 230/62,960 (365)        | 80/18,846 (424)       | 35/10,931 (320)                                      | 13/5,001 (260)      | 2/526 (380)                                       | 1/122 (817)      |
| Physical exercise (per week)               |                         |                       |                                                      |                     |                                                   |                  |
| None                                       | 24,451/7,102,848 (344)  | 5,516/1,372,761 (402) | 3,030/888,649 (341)                                  | 1,472/398,264 (370) | 162/46,698 (347)                                  | 60/13,842 (433)  |
| 1~2                                        | 6,186/1,870,389 (331)   | 1,739/453,619 (383)   | 983/297,980 (330)                                    | 485/130,935 (370)   | 65/16,384 (397)                                   | 28/5,833 (480)   |
| 3~4                                        | 3,432/1,043,552 (329)   | 1,036/274,412 (378)   | 626/179,156 (349)                                    | 305/75,365 (405)    | 35/10,955 (319)                                   | 18/3,890 (463)   |
| 5~6                                        | 1,102/340,642 (324)     | 323/89,431 (361)      | 165/58,548 (282)                                     | 89/23,732 (375)     | 16/3,173 (504)                                    | 5/1,138 (439)    |
| Daily                                      | 2,440/708,086 (345)     | 620/155,814 (398)     | 274/83,891 (327)                                     | 179/46,451 (385)    | 23/5,719 (402)                                    | 14/1,829 (765)   |
| Period from menopause to inclusion (years) |                         |                       |                                                      |                     |                                                   |                  |
| <5                                         | 13,190/4,478,344 (295)  | 5,076/1,384,801 (367) | 3,358/1,034,317 (325)                                | 1,273/365,424 (348) | 154/43,488 (354)                                  | 64/14,134 (453)  |
| 5~9                                        | 8,316/2,533,296 (328)   | 2,304/571,550 (403)   | 1,098/318,434 (345)                                  | 668/173,910 (384)   | 81/20,971 (386)                                   | 34/7,243 (469)   |
| 10~                                        | 18,531/4,591,308 (404)  | 2,192/467,059 (469)   | 781/197,291 (396)                                    | 678/157,187 (431)   | 74/21,020 (352)                                   | 30/6,143 (488)   |

BMI, Body mass index, CCI, Charlson comorbidity index; MHT, menopausal hormone therapy; SES, socioeconomic status  
Data are expressed as the case/person-years ( case/ 100,000 person-years).
